# Supplementary material for: Discovery of a potent small molecule inhibiting Huntington’s disease (HD) pathogenesis via targeting CAG repeats RNA and Poly Q protein
Source: PubMed Central journal article supplement (PMC6856162; doi:10.1038/s41598-019-53410-z), 2019-11-14
Supplement: 41598_2019_53410_MOESM1_ESM.pdf [file 41598_2019_53410_MOESM1_ESM.pdf]

**Discovery of a potent small molecule inhibiting Huntington's disease pathogenesis *via* targeting CAG repeat RNA and Poly Q protein**

Eshan Khan<sup>a</sup>, Subodh Kumar Mishra<sup>a</sup>, Ribhav Mishra<sup>b</sup>, Amit Mishra<sup>b</sup>, and Amit Kumar<sup>a†</sup>

<sup>a</sup> Discipline of Biosciences and Biomedical Engineering, Indian Institute of Technology Indore, Simrol, Indore 453552, India

<sup>b</sup> Cellular and Molecular Neurobiology Unit, Indian Institute of Technology Jodhpur, Rajasthan 342011, India

<sup>†</sup>**Correspondence:** Amit Kumar, Associate Professor, Discipline of Biosciences and Biomedical Engineering, Indian Institute of Technology Indore, Simrol, Indore 453552, India Tel: +91-731-2438-771; Fax: +91-731-2438-721; Email: [amitk@iiti.ac.in](mailto:amitk@iiti.ac.in); [amitkdb@gmail.com](mailto:amitkdb@gmail.com)

| <b>Table of Contents</b>       |                                                                                                                      |                |
|--------------------------------|----------------------------------------------------------------------------------------------------------------------|----------------|
| <b>Supplementary Tables</b>    |                                                                                                                      | <b>S10-S17</b> |
| <b>Supplementary Table 1</b>   | Chemical structures of the small-molecules used in screening                                                         | <b>S10-S12</b> |
| <b>Supplementary Table 2</b>   | The binding constant values of compounds with one motif RNA                                                          | <b>S13</b>     |
| <b>Supplementary Table 3</b>   | The binding constant values of compounds with multiple motif RNA                                                     | <b>S14</b>     |
| <b>Supplementary Table 4</b>   | The binding constant values of compounds with multiple motif RNA using ITC                                           | <b>S15</b>     |
| <b>Supplementary Table 5</b>   | The melting temperature values of different 5'CAG/3'GAC & 5'CAG/3'GUC RNA motif in absence and presence of compounds | <b>S16</b>     |
| <b>Supplementary Table 6</b>   | The IC50 values of compounds with HEK293 cells calculated by MTT assay                                               | <b>S17</b>     |
| <b>Supplementary Figures</b>   |                                                                                                                      | <b>S18-23</b>  |
| <b>Supplementary Figure 1</b>  | Fluorescence titration curves of RNAs with compounds                                                                 | <b>S18-S19</b> |
| <b>Supplementary Figure 2</b>  | Plots of Isothermal titration calorimetry                                                                            | <b>S20</b>     |
| <b>Supplementary Figure 3a</b> | PCR stop assay                                                                                                       | <b>S21</b>     |
| <b>Supplementary Figure 3b</b> | Quantification of PCR stop assay                                                                                     | <b>S22</b>     |
| <b>Supplementary Figure 4a</b> | Gel retardation assay                                                                                                | <b>S23</b>     |
| <b>Supplementary Figure 4b</b> | Quantification of Gel retardation assay                                                                              | <b>S24</b>     |
| <b>Supplementary Figure 5</b>  | Cell viability assay                                                                                                 | <b>S25</b>     |
| <b>Supplementary Figure 6</b>  | Western blot analysis full images                                                                                    | <b>S26</b>     |

CP1=NSC351550 M.W.= 256.28

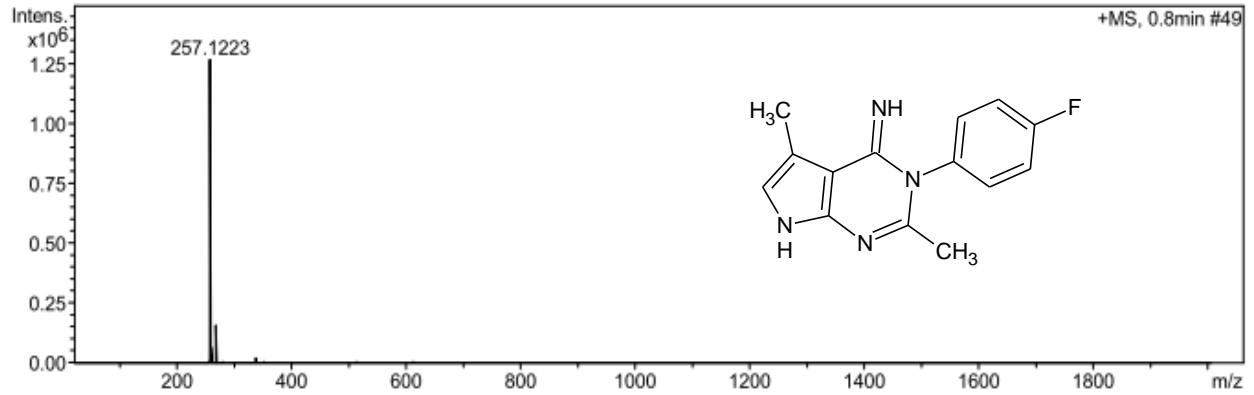

CP2= NSC52101, M.W. = 314.83

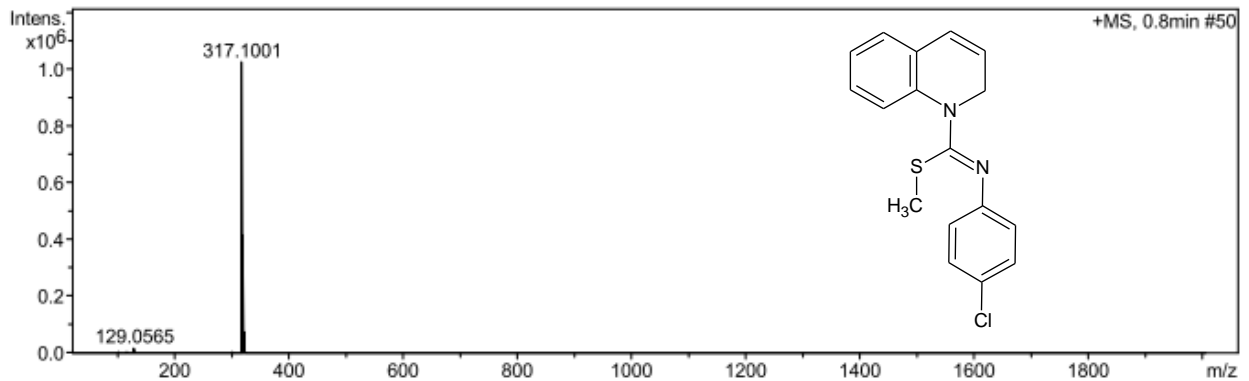

CP3= NSC47923, M.W. = 263.33

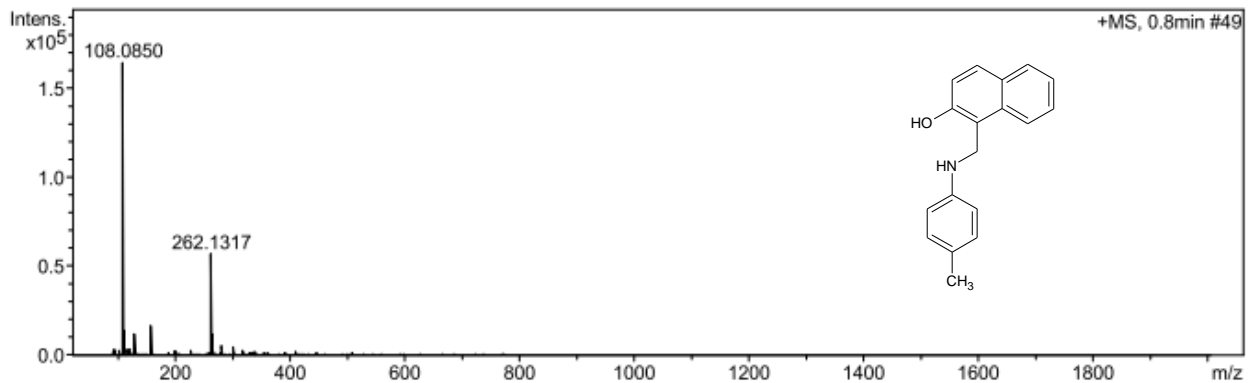

CP4= NSC351310, M.W. = 220.27

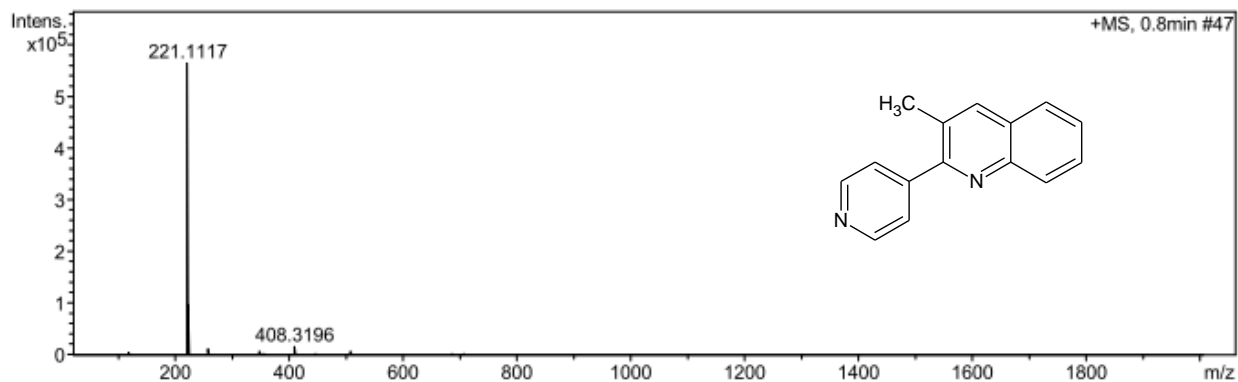

CP5= NSC101815, M.W. = 290.36

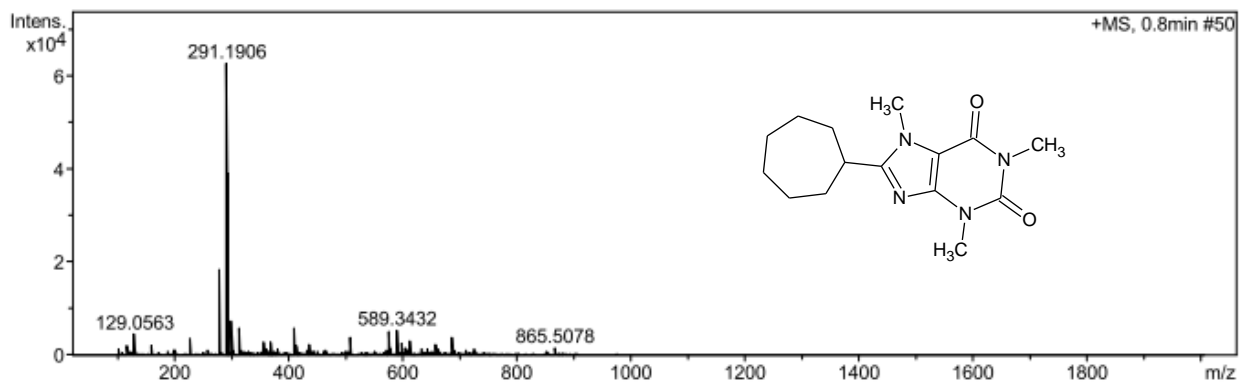

CP6= NSC66098, M.W. = 270.32

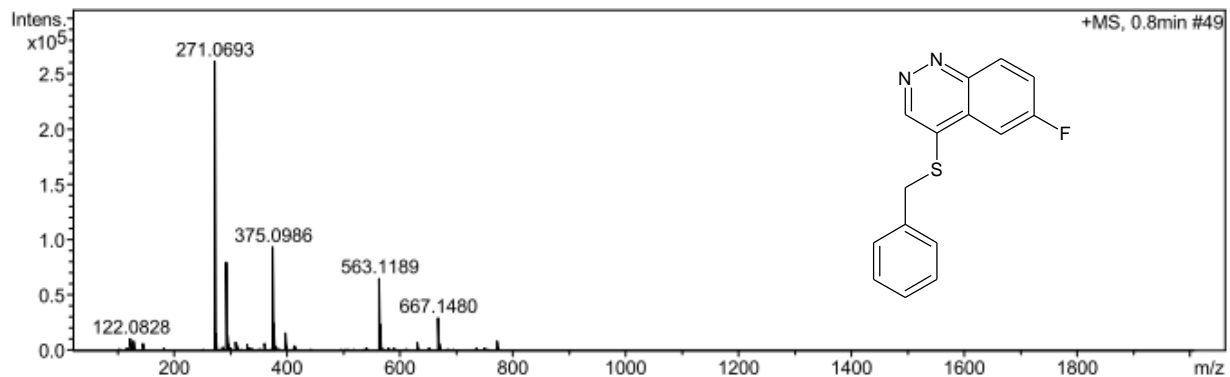

**CP7= NSC12769, M.W. = 255.70**

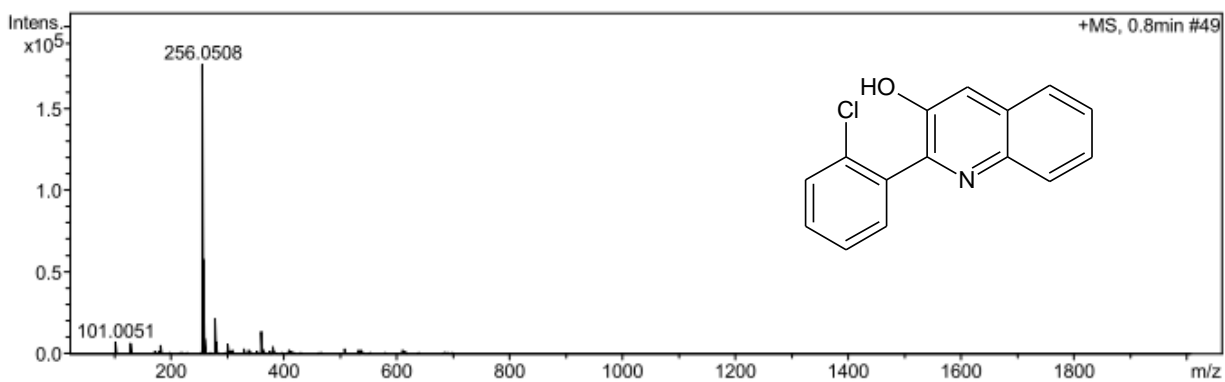

**CP8= NSC14378, M.W. = 265.33**

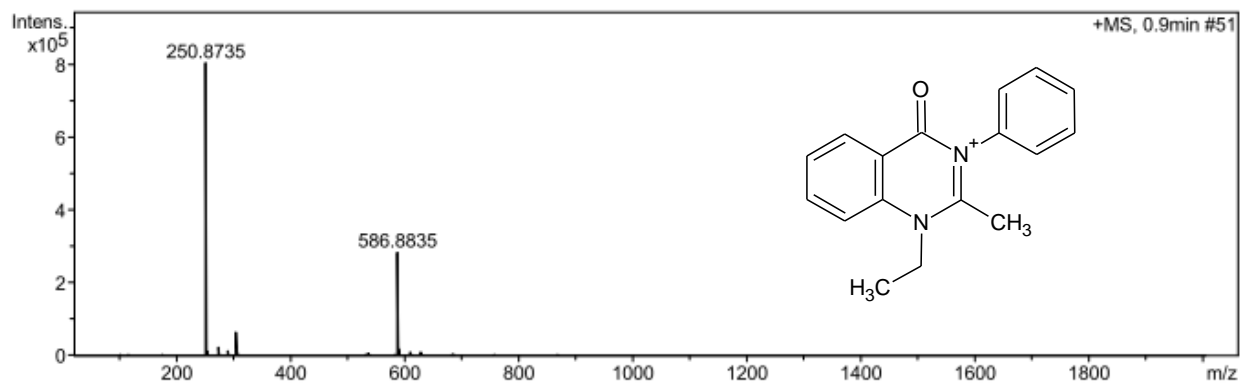

**CP9= NSC65028, M.W. = 253.25**

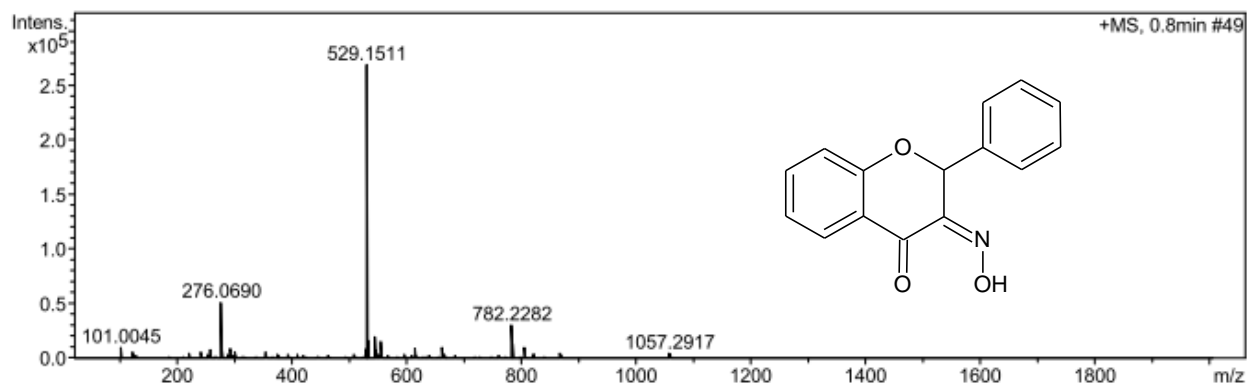

CP10= NSC66104, M.W. = 250.27

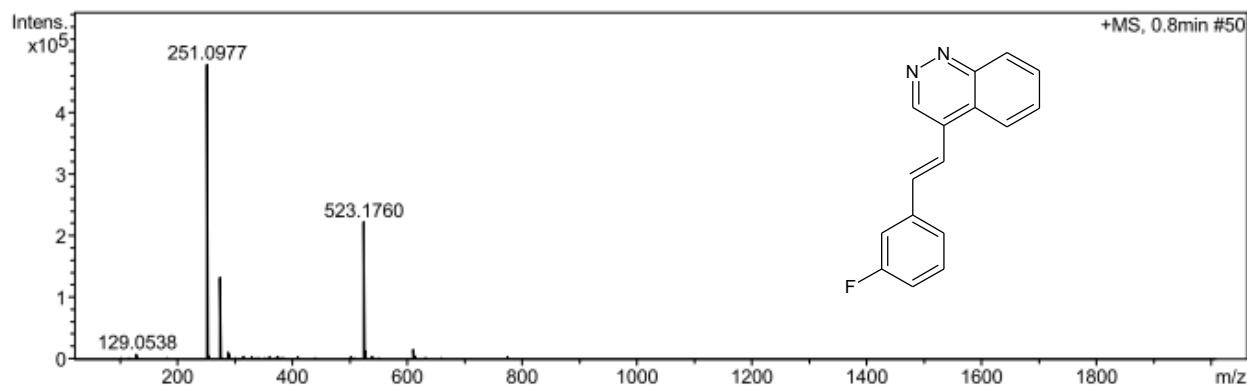

CP11= NSC97487, M.W. = 224.25

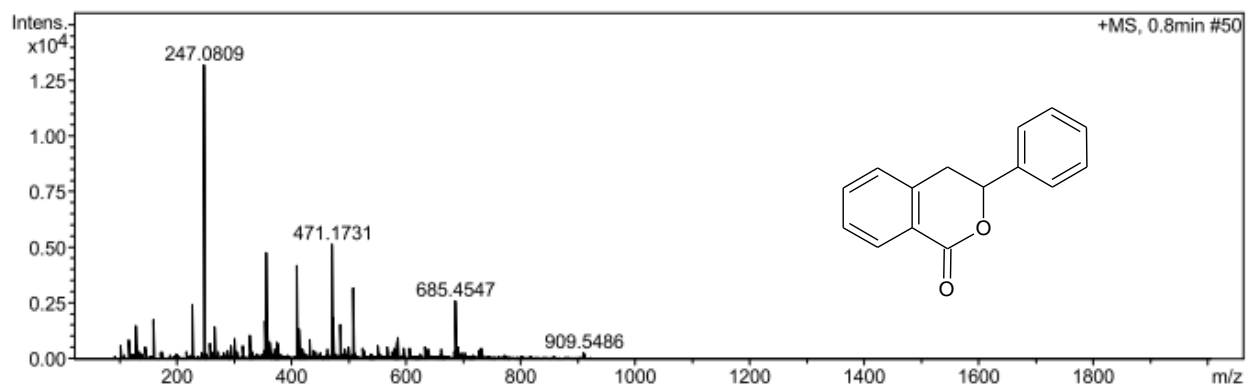

CP12= NSC12823, M.W. = 284.15

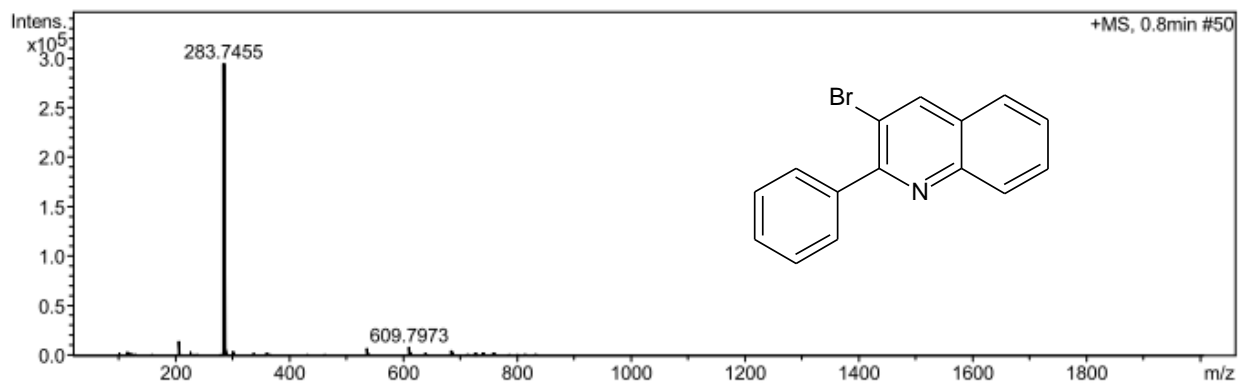

CP13= NSC109779, M.W. = 237.27

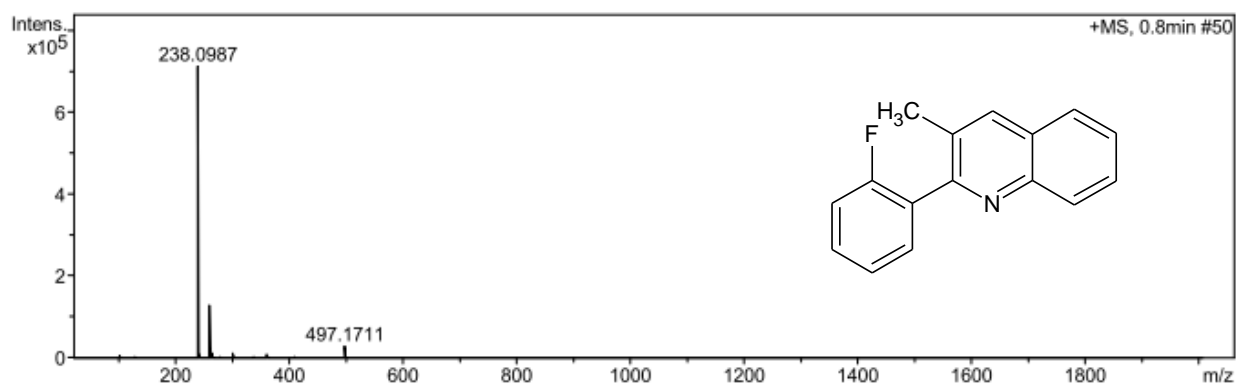

CP14= NSC25678, M.W. = 277.32

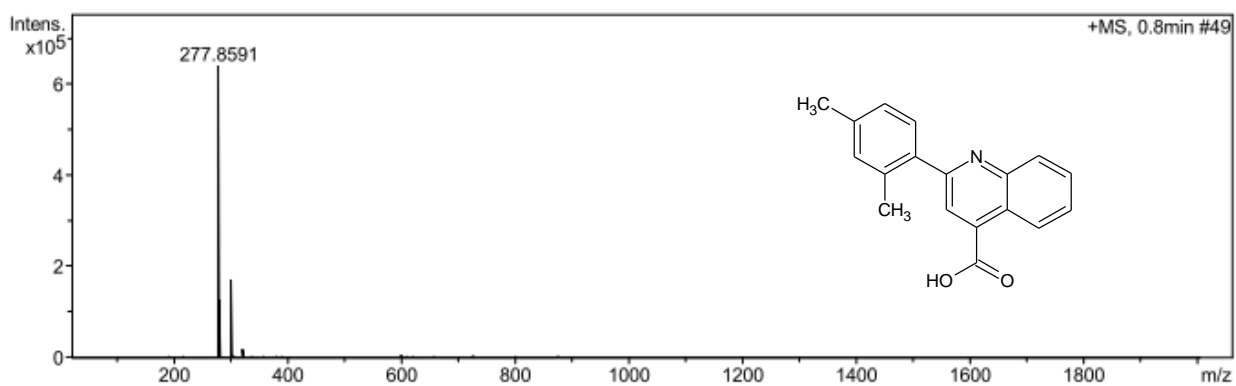

CP15= NSC12776, M.W. = 297.74

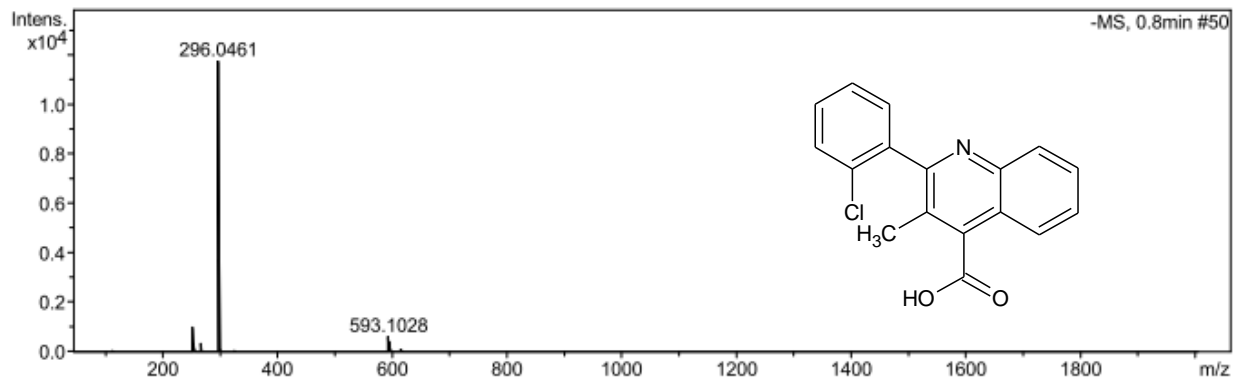

**CP16= NSC14049, M.W. = 233.31**

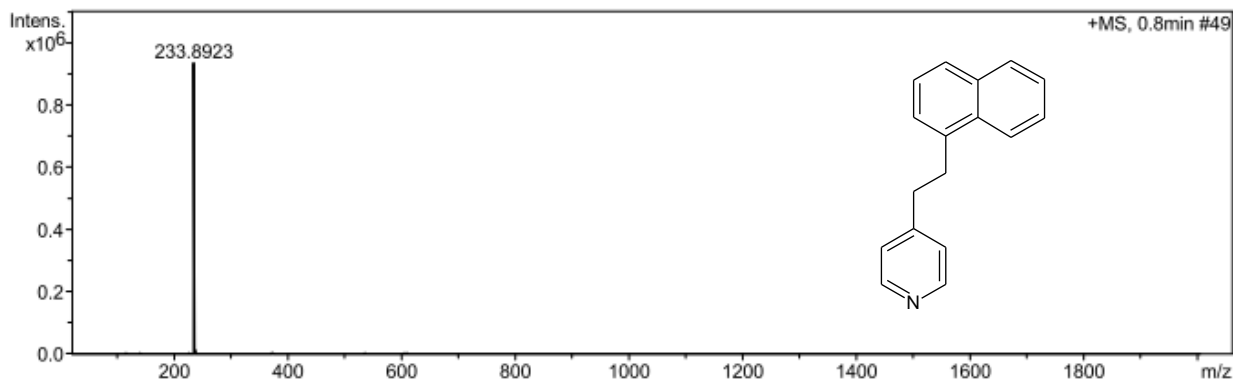

**CP17= NSC354463, M.W. = 265.31**

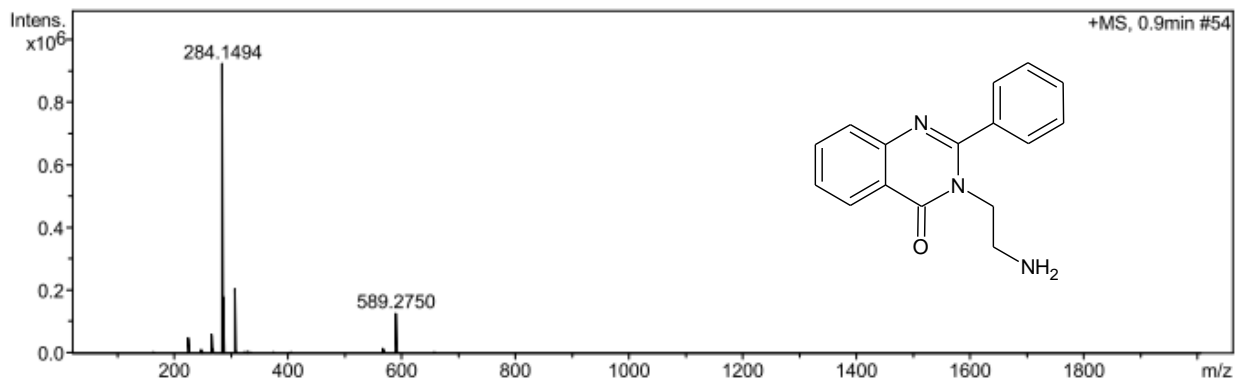

**CP18= NSC109780, M.W. = 254.71**



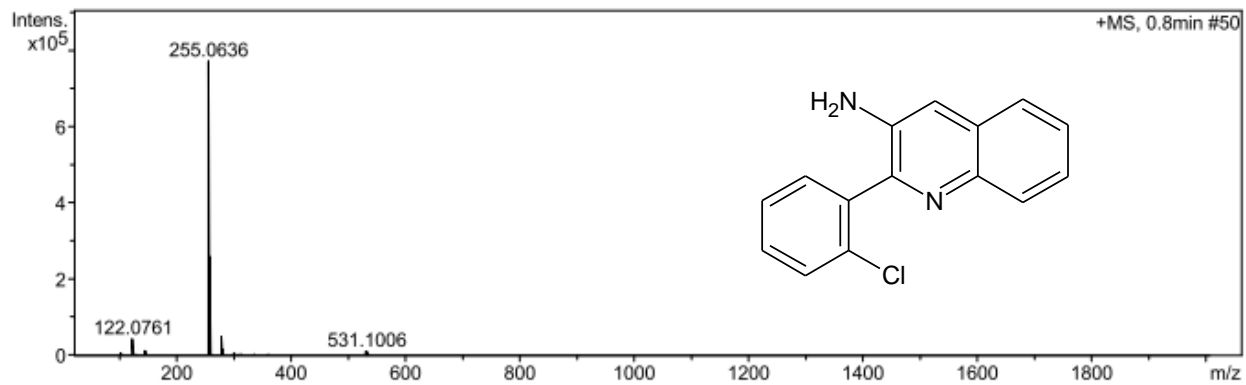

CP19= NSC401369, M.W. = 250.31

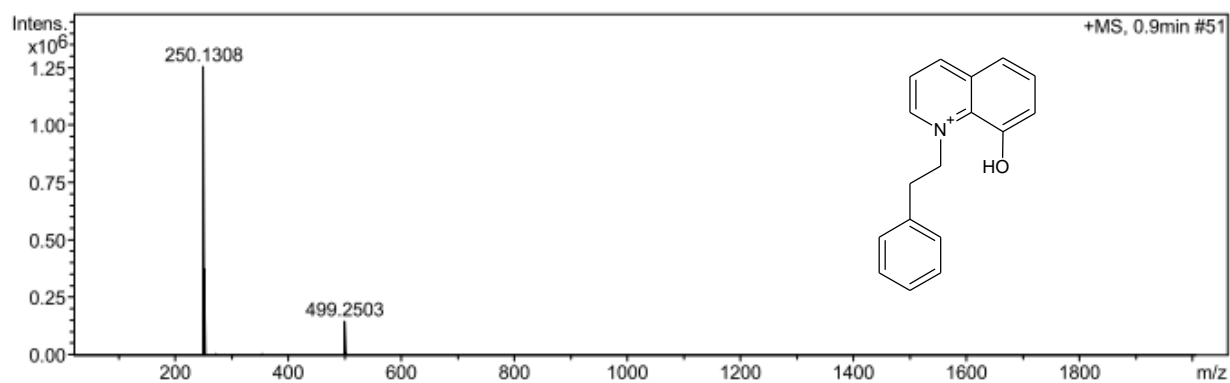

**Table S1** Chemical structures of the small-molecules used in screening for repeats containing RNA

| Compound Code | Structure |
|---------------|-----------|
| CP1           |           |
| CP2           |           |
| CP3           |           |
| CP4           |           |
| CP5           |           |
| CP6           |           |
| CP7           |           |

|      |                                                                                      |
|------|--------------------------------------------------------------------------------------|
| CP8  | 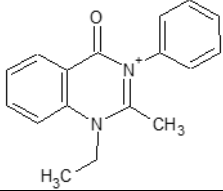   |
| CP9  |    |
| CP10 |    |
| CP11 |   |
| CP12 |  |
| CP13 |  |
| CP14 |  |
| CP15 |  |

|      |                                                                                     |
|------|-------------------------------------------------------------------------------------|
| CP16 | 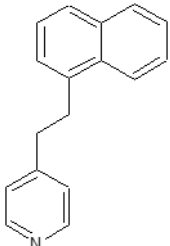  |
| CP17 |   |
| CP18 |   |
| CP19 |  |

**Table S2:** The binding constant ( $K_d$  ( $\mu\text{M}$ )) values of compounds with RNA 5' CAG/3'GAC and 5' CAG/3'GUC

| Compound | Binding constant values ( $\mu\text{M}$ ) |                    |                  |        |
|----------|-------------------------------------------|--------------------|------------------|--------|
|          | RNA 5' CAG/3'GAC                          |                    | RNA 5' CAG/3'GUC |        |
|          | $K_d1$                                    | $K_d2$             | $K_d1$           | $K_d2$ |
| CP1      | 0.1672                                    | 11.4500            | 0.0280           | 0.4521 |
| CP2      | 0.0540                                    | 2.1215             | 0.5662           | 0.5662 |
| CP3      | 0.0893                                    | 1.5579             | 0.2031           | 0.7697 |
| CP4      | 0.0009                                    | 0.7255             | 0.0092           | 0.7178 |
| CP5      | 1.3840                                    | 1.3840             | 0.6657           | 0.6657 |
| CP6      | 0.0476                                    | 0.9693             | 0.7339           | 0.7339 |
| CP7      | 0.0178                                    | 2.4435             | 0.0005           | 1.1453 |
| CP8      | 0.0103                                    | 4.7000             | 0.6154           | 0.6154 |
| CP9      | 0.6778                                    | $1.91 \times 10^7$ | 0.0124           | 0.9227 |
| CP10     | 0.9087                                    | $1.81 \times 10^7$ | 0.4957           | 0.4957 |
| CP11     | 1.4307                                    | 1.4307             | 1.2764           | 1.2764 |
| CP12     | 2.1650                                    | 2.1650             | 0.6115           | 0.6115 |
| CP13     | 0.3455                                    | 1.0217             | 1.2717           | 1.2717 |
| CP14     | 0.0675                                    | 4.1180             | 0.5012           | 1.9855 |
| CP15     | 0.0135                                    | 0.1948             | 0.0172           | 0.6402 |
| CP16     | 1.5816                                    | 1.5816             | 0.4933           | 0.4933 |
| CP17     | N.D.                                      | N.D.               | N.D.             | N.D.   |
| CP18     | 1.0361                                    | 1.0361             | 0.6931           | 0.6931 |
| CP19     | 0.3463                                    | 4048.3000          | N.D.             | N.D.   |

**Table S3:** The binding constant ( $K_d$ , ( $\mu\text{M}$ )) values of compounds with multiple loop RNAs

| Compounds        | Binding constant values ( $\mu\text{M}$ ) |        |                     |        |
|------------------|-------------------------------------------|--------|---------------------|--------|
|                  | RNA (5'CAG/3'GAC)x6                       |        | RNA (5'CAG/3'GUC)x6 |        |
|                  | $K_d1$                                    | $K_d2$ | $K_d1$              | $K_d2$ |
| <b>CP2</b>       | 0.0003                                    | 0.1749 | 0.6203              | 0.6203 |
| <b>CP3</b>       | 0.0495                                    | 0.1588 | 0.2452              | 0.2452 |
| <b>CP4</b>       | 0.2188                                    | 0.49   | 0.4407              | 0.7459 |
| <b>CP6</b>       | 0.0005                                    | 0.1344 | 0.2021              | 0.2021 |
| <b>CP8</b>       | 0.2061                                    | 0.1768 | 0.1150              | 0.1758 |
| <b>CP13</b>      | 0.0015                                    | 0.387  | 0.3038              | 0.3038 |
| <b>CP14</b>      | 0.1823                                    | 0.1823 | 0.2823              | 0.2823 |
| <b>Myricetin</b> | 0.0730                                    | 0.4699 | N.D.                | 2.4757 |

**Table S4.** The binding constant ( $K_d$ ) values of compounds with multiple loop RNAs calculated using ITC experiment.

| Compounds | Binding constant values |                    |                     |                    |
|-----------|-------------------------|--------------------|---------------------|--------------------|
|           | RNA (5'CAG/3'GAC)x6     |                    | RNA (5'CAG/3'GUC)x6 |                    |
|           | $K_d^1$ ( $\mu$ M)      | $K_d^2$ ( $\mu$ M) | $K_d^1$ ( $\mu$ M)  | $K_d^2$ ( $\mu$ M) |
| CP2       | 0.028                   | 12.3               | 9.52                | N.D.               |
| CP3       | 27.700                  | 2.13               | -                   | -                  |
| CP4       | 62.500                  | 3.18               | -                   | -                  |
| CP6       | 0.709                   | 10.86              | 30.3                | 0.42               |
| CP8       | 38.010                  | 2.35               | -                   | -                  |
| CP13      | 0.011                   | 1.54               | 3.89                | 174.2              |
| CP14      | 60.200                  | 6.89               | -                   | -                  |
| Myricetin | 0.253                   | 26.24              | -                   | -                  |

**Table S6.** The IC<sub>50</sub> values of compounds with HEK293 cells calculated by MTT assay

| Compounds | IC <sub>50</sub> Values (μM) |                         |          |
|-----------|------------------------------|-------------------------|----------|
|           | HEK293 Cells                 | Normal fibroblast cells | HD cells |
| CP2       | 19.06                        | 56.33                   | 46.63    |
| CP3       | 42.44                        | -                       | -        |
| CP4       | 76.99                        | -                       | -        |
| CP6       | 40.24                        | 55.30                   | 44.44    |
| CP8       | 17.38                        | -                       | -        |
| CP13      | 62.86                        | 53.17                   | 52.70    |
| CP14      | 17.25                        | -                       | -        |
| Myricetin | 22.45                        | -                       | -        |



**Table S5.** The melting temperature values of different 5'CAG/3'GAC & 5'CAG/3'GUC RNA loop in absence and presence of compounds

| Compounds | Drug/Nucleic acid ratio | Melting temperature (°C) of different loop containing RNAs |      |      |
|-----------|-------------------------|------------------------------------------------------------|------|------|
|           |                         | AAx20                                                      | AAx6 | AUX6 |
| CP2       | DN0.0                   | 67.6                                                       | 57.6 | 61.8 |
|           | DN1.0                   | 70.4                                                       | 61.8 | 61.9 |
|           | DN2.0                   | 72.1                                                       | 63.0 | 62.5 |
|           | DN3.0                   | 75.2                                                       | -    | -    |
| CP6       | DN0.0                   | 67.8                                                       | 57.0 | 60.4 |
|           | DN1.0                   | 70.2                                                       | 59.8 | 60.8 |
|           | DN2.0                   | 71.9                                                       | 62.8 | 61.4 |
|           | DN3.0                   | 74.9                                                       | -    | -    |
| CP13      | DN0.0                   | 66.8                                                       | 51.8 | 62.0 |
|           | DN1.0                   | 69.1                                                       | 55.4 | 61.8 |
|           | DN2.0                   | 72.2                                                       | 57.9 | 62.2 |
|           | DN3.0                   | 75.2                                                       | -    | -    |

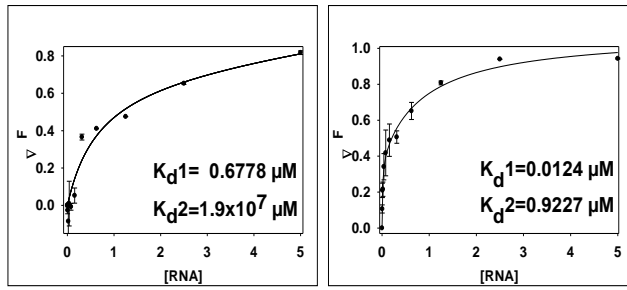

(5'CAG/3'GAC) $\times$ 1

(5'CAG/3'GUC) $\times$ 1

CP9

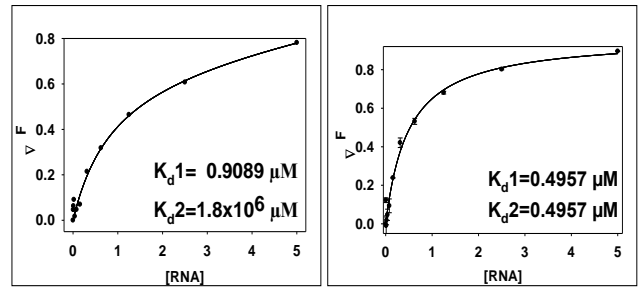

(5'CAG/3'GAC) $\times$ 1

(5'CAG/3'GUC) $\times$ 1

CP10

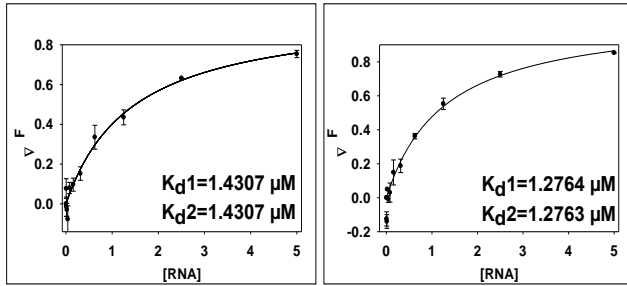

(5'CAG/3'GAC) $\times$ 1

(5'CAG/3'GUC) $\times$ 1

CP11

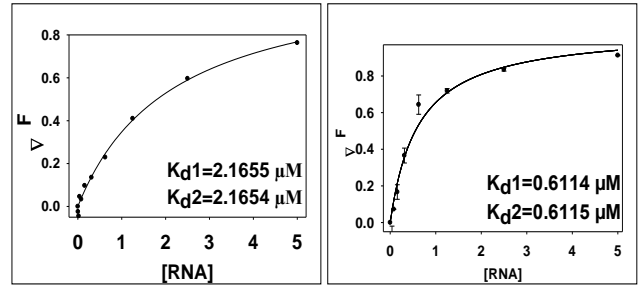

(5'CAG/3'GAC) $\times$ 1

(5'CAG/3'GUC) $\times$ 1

CP12

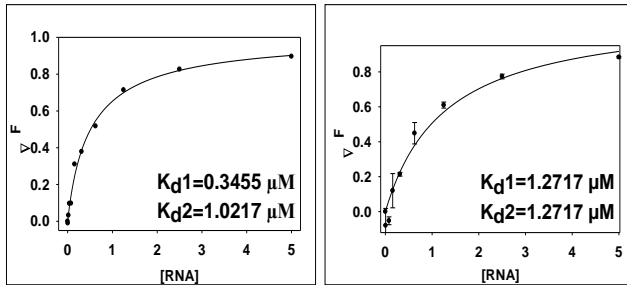

(5'CAG/3'GAC) $\times$ 1

(5'CAG/3'GUC) $\times$ 1

CP13

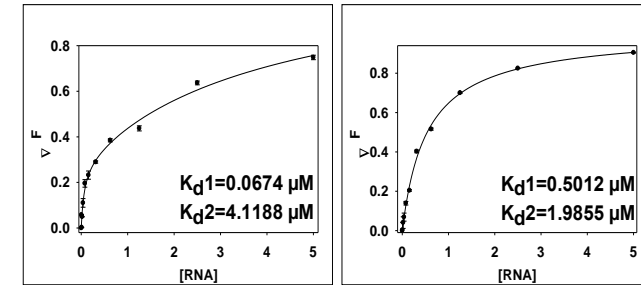

(5'CAG/3'GAC) $\times$ 1

(5'CAG/3'GUC) $\times$ 1

CP14

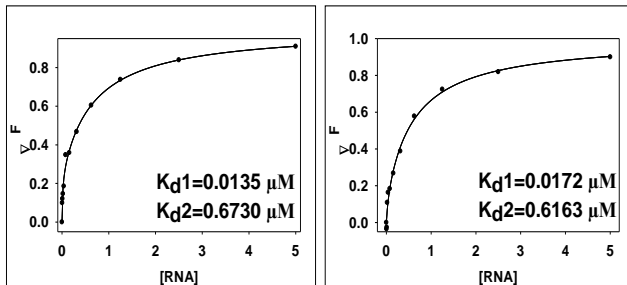

(5'CAG/3'GAC) $\times$ 1

(5'CAG/3'GUC) $\times$ 1

CP15

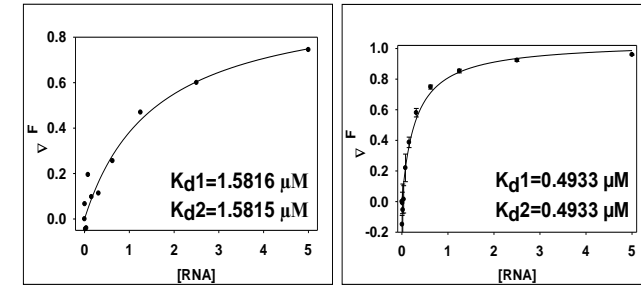

(5'CAG/3'GAC) $\times$ 1

(5'CAG/3'GUC) $\times$ 1

CP16

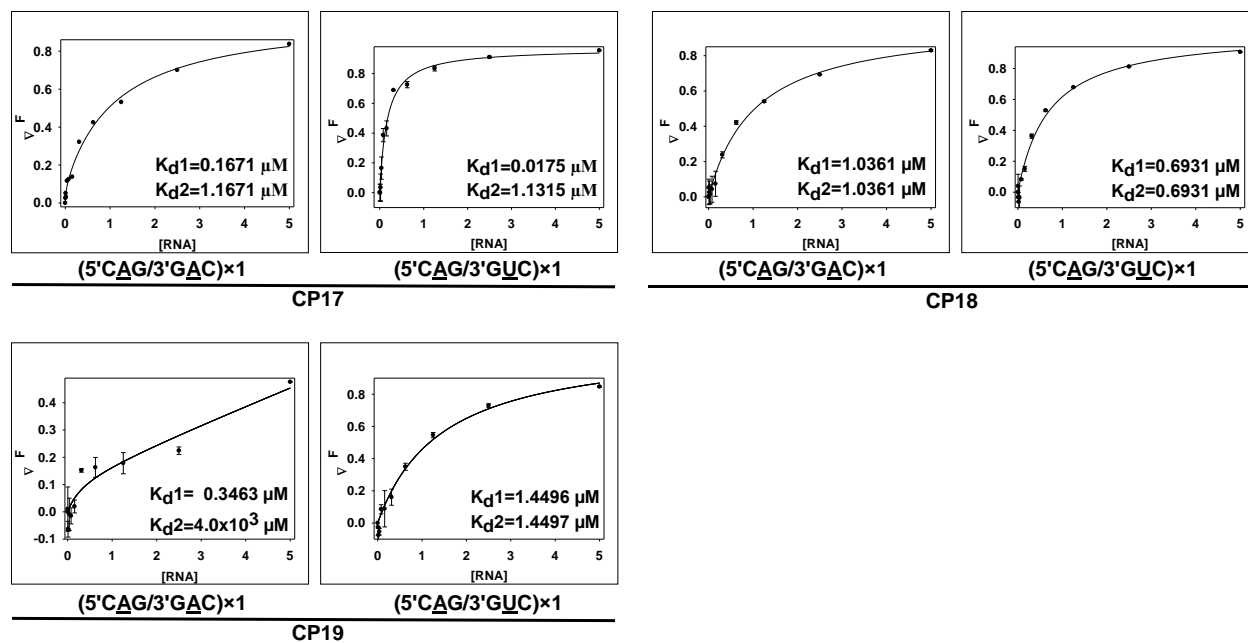

**Figure S1.** Fluorescence titration curves of RNAs (5'CAG/3'GAC)<sub>x1</sub> & (5'CAG/3'GUC)<sub>x1</sub> RNA respectively with different compounds. Solid lines represent the data fitting by two sites saturation ligand binding mode. Values of binding constant (s) ( $K_d$ ) are mentioned in right bottom side of the plot.

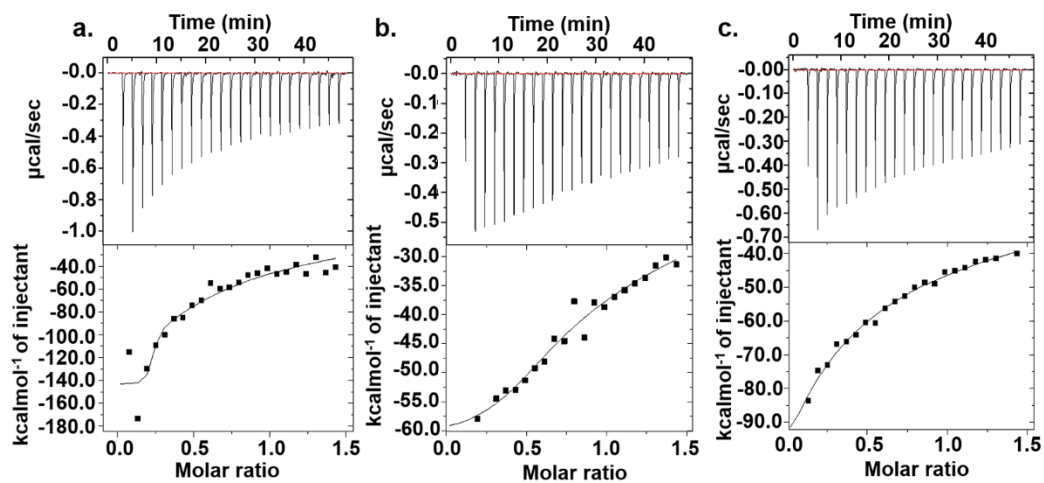

**Figure S2.** Isothermal titration calorimetry assay of (5'CA $\underline{G}$ /3'GU $\underline{C}$ )<sub>6</sub> RNA with compounds (a) CP2 (b) CP6 (c) CP13

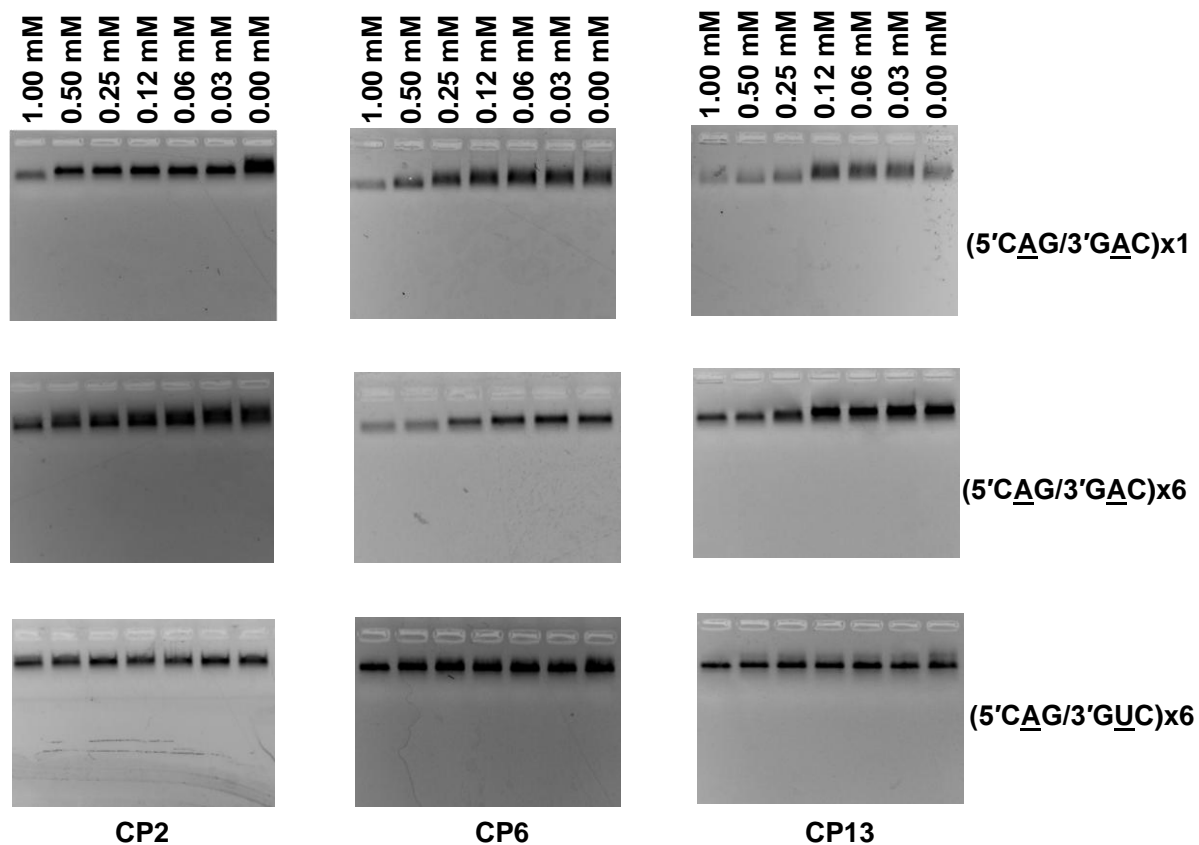

**Figure S3a.** PCR stop assay of compounds CP2, CP6 & CP13 (Left to right) with different motif DNA templates (5'CAG/3'GAC)x1, (5'CAG/3'GAC)x6 & (5'CAG/3'GUC)x6 respectively (top to bottom).

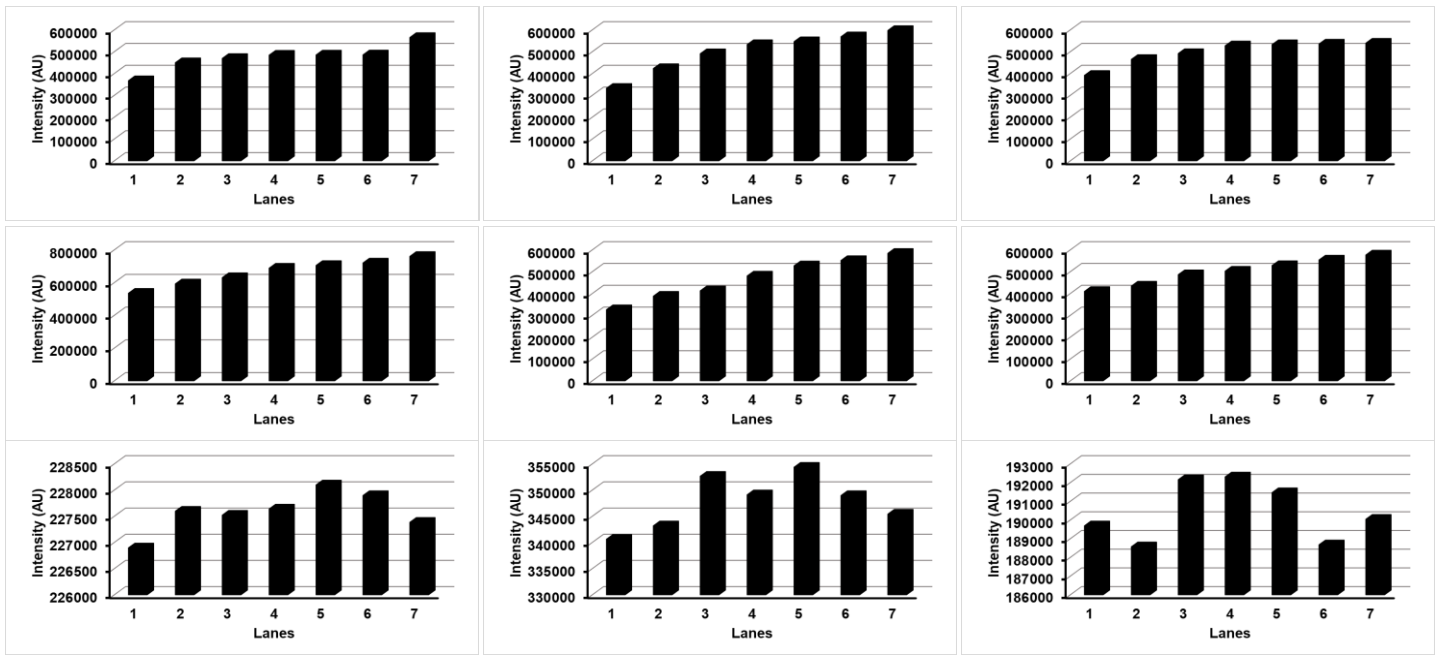

**Figure S3b.** Gel intensity calculated using ImageJ for PCR stop assay. Plots depicts the results for CP2, CP6 & CP13 (**Left to right**) with different motif DNA templates (5'CAG/3'GAC)x1, (5'CAG/3'GAC)x6 & (5'CAG/3'GUC)x6 respectively (**top to bottom**).

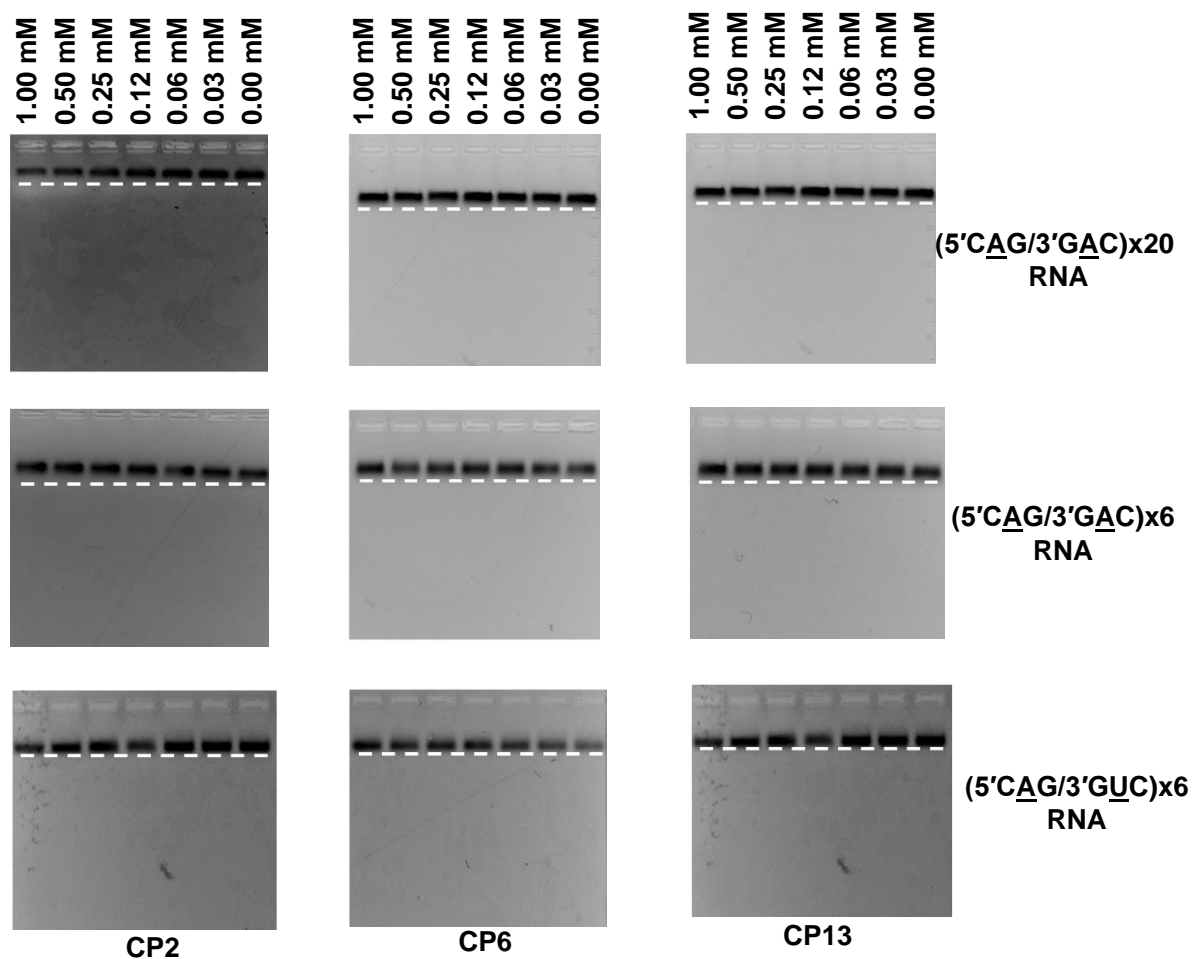

**Figure S4a.** Gel retardation assay of compounds CP2, CP6 & CP13 (Left to right) with different motif RNA templates (5'CAG/3'GAC)x20, (5'CAG/3'GAC)x6 & (5'CAG/3'GUC)x6 respectively (top to bottom).

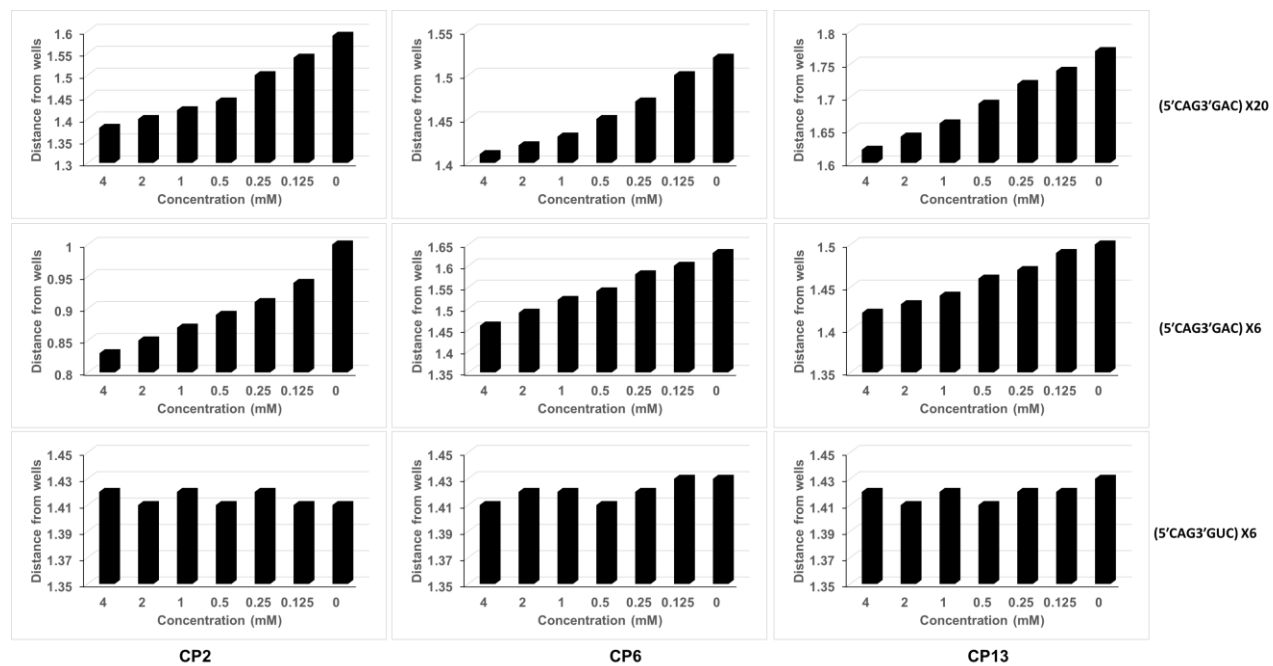

Figure S4b. Plots for distance travelled from wells in gel retardation assay of compounds CP2, CP6 & CP13 (Left to right) with different motif RNA templates (5'CAG/3'GAC)x20, (5'CAG/3'GAC)x6 & (5'CAG/3'GUC)x6 respectively (top to bottom).



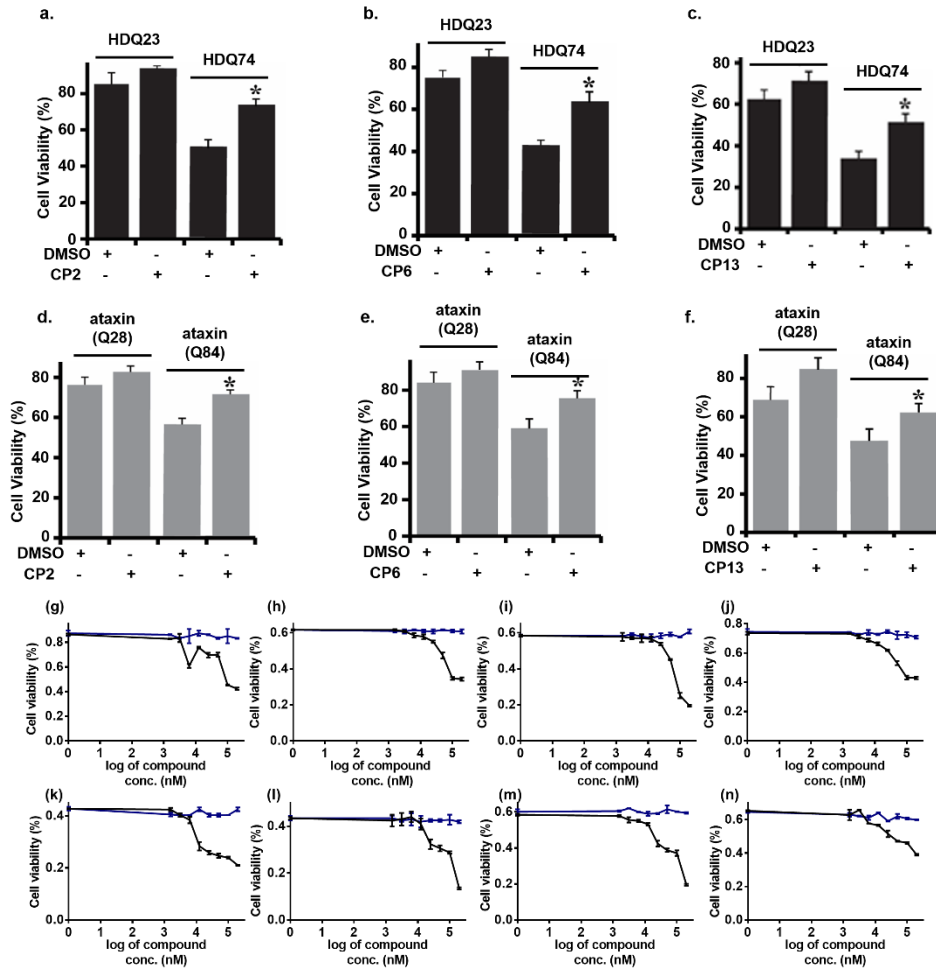

**Figure S5.** Cell viability assay in HD cellular models. **(a-f)** Cos-7 cells were transfected with polyglutamine encoding plasmids (HDQ23, HDQ74, ATX28 and ATX84) and treated with compounds to assess the cyto-protection effects of compounds. **(g-n)** Viability of cells treated with compounds on normal HEK293 cells with **(g)** CP2 **(h)** CP3 **(i)** CP4 **(j)** CP6 **(k)** CP8 **(l)** CP13 **(m)** CP14 **(n)** Myricetin. Blue line showing the curve for vehicle (control) while black lines represents viability of cells treated with compounds. Values shown are the mean  $\pm$  SD from three independent sets of experiments. \* $p < 0.05$  compared to control

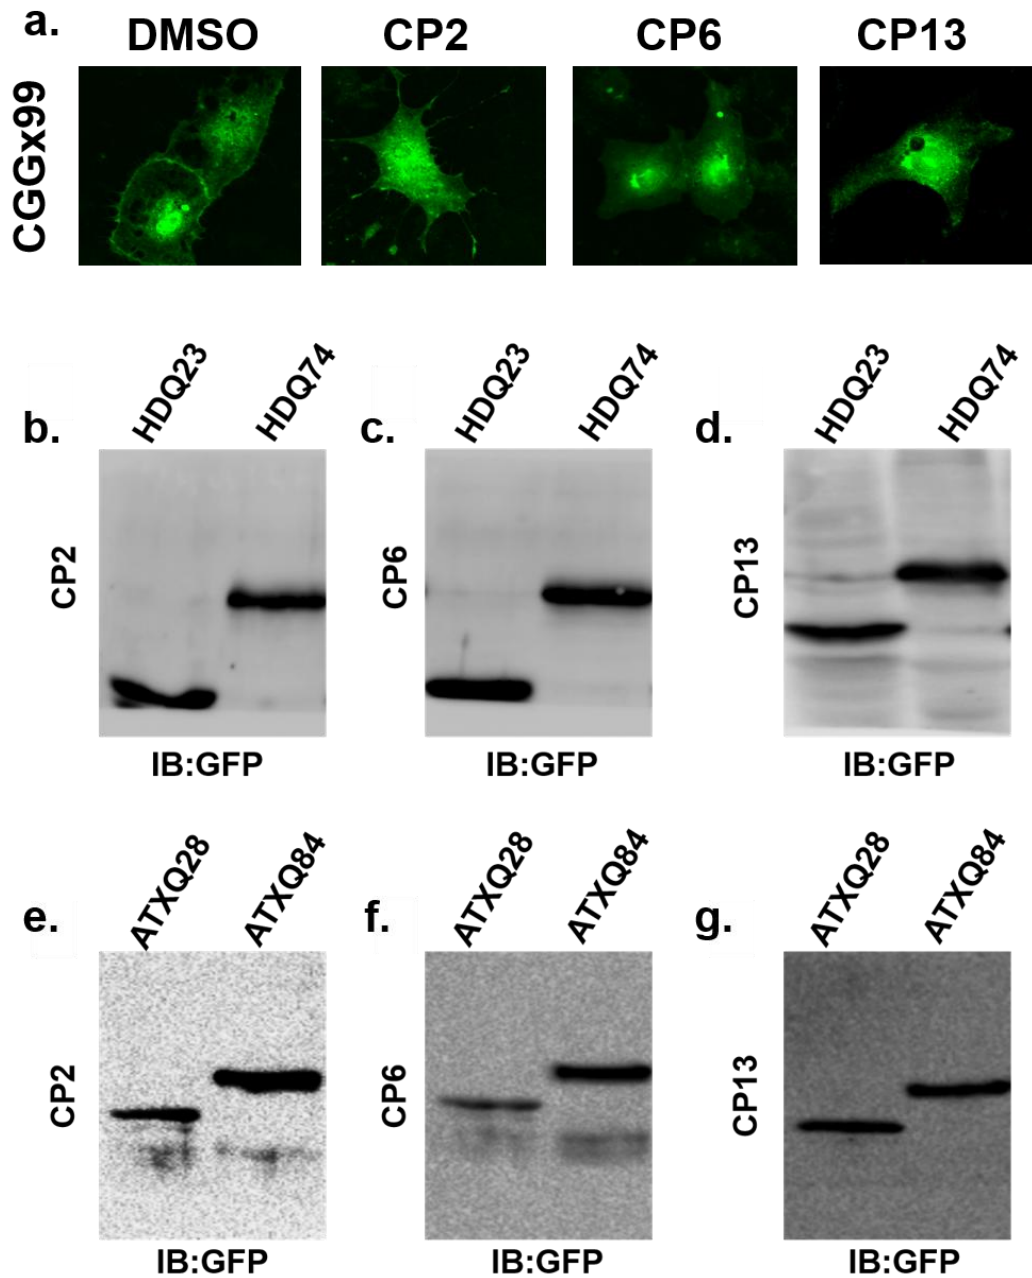

Figure S6 (a) Micrographs of EGFP-CGG99, transiently transfected COS-7 cells, treated with control (DMSO) as well as compounds (100.0  $\mu$ M) for 12 hours (b-g) Full images of western blots. Plasmid expression analysis of the cells was confirmed by immunoblot, using anti-GFP antibodies (top lane) HDQ plasmid treated with (a) CP2 (b) CP6 (c) CP13 (bottom lane) ATX plasmid treated with (d) CP2 (e) CP6 (f) CP13
